# Supplementary material for: Harnessing the potential of blood donation archives for influenza surveillance and control
Source: PLoS One. 2020 May 29;15(5):e0233605. doi: 10.1371/journal.pone.0233605 (PMC7259782; doi:10.1371/journal.pone.0233605)
Supplement: S2 Data — (XLSX) [file pone.0233605.s009.xlsx]

## Sheet: S2_data_H3_ver2
id	HI_preH3	Donation_preH3_yearmon	HI_postH3	Donation_postH3_yearmon	Birth_year	age	agegrp
1	5	2010-07-01	5	2010-12-01	1951	59	(55,65]
2	20	2010-07-01	20	2010-12-01	1958	52	(45,55]
3	10	2010-07-01	10	2010-12-01	1958	52	(45,55]
4	10	2010-07-01	20	2010-12-01	1954	56	(55,65]
5	5	2010-07-01	10	2010-12-01	1951	59	(55,65]
6	10	2010-07-01	80	2010-12-01	1955	55	(45,55]
7	5	2010-07-01	320	2010-12-01	1953	57	(55,65]
8	5	2010-07-01	5	2010-12-01	1959	51	(45,55]
9	320	2010-07-01	320	2010-12-01	1953	57	(55,65]
10	20	2010-07-01	80	2010-12-01	1960	50	(45,55]
11	40	2010-07-01	40	2010-12-01	1952	58	(55,65]
12	5	2010-07-01	80	2010-12-01	1948	62	(55,65]
13	5	2010-07-01	40	2010-12-01	1960	50	(45,55]
14	40	2010-07-01	160	2010-12-01	1946	64	(55,65]
15	5	2010-07-01	5	2010-12-01	1944	66	NA
16	40	2010-07-01	40	2010-12-01	1953	57	(55,65]
17	10	2010-07-01	5	2010-12-01	1960	50	(45,55]
18	20	2010-07-01	20	2010-12-01	1951	59	(55,65]
19	10	2010-07-01	5	2010-12-01	1960	50	(45,55]
20	5	2010-07-01	10	2010-12-01	1963	47	(45,55]
21	5	2010-07-01	5	2010-12-01	1954	56	(55,65]
22	5	2010-07-01	5	2010-12-01	1960	50	(45,55]
23	20	2010-07-01	10	2010-12-01	1963	47	(45,55]
24	10	2010-07-01	10	2010-12-01	1964	46	(45,55]
25	20	2010-07-01	10	2010-12-01	1967	43	(35,45]
26	10	2010-07-01	10	2010-12-01	1965	45	(35,45]
27	10	2010-07-01	10	2010-12-01	1970	40	(35,45]
28	80	2010-07-01	160	2010-12-01	1964	46	(45,55]
29	20	2010-07-01	40	2010-12-01	1969	41	(35,45]
30	10	2010-07-01	20	2010-12-01	1971	39	(35,45]
31	20	2010-07-01	40	2010-12-01	1949	61	(55,65]
32	10	2010-07-01	10	2010-12-01	1974	36	(35,45]
33	40	2010-07-01	40	2010-12-01	1975	35	(25,35]
34	20	2010-07-01	20	2010-12-01	1976	34	(25,35]
35	320	2010-07-01	160	2010-12-01	1976	34	(25,35]
36	40	2010-07-01	40	2010-12-01	1976	34	(25,35]
37	5	2010-07-01	5	2010-12-01	1976	34	(25,35]
38	5	2010-07-01	10	2010-12-01	1978	32	(25,35]
39	10	2010-07-01	10	2010-12-01	1975	35	(25,35]
40	10	2010-07-01	80	2010-12-01	1972	38	(35,45]
41	10	2010-07-01	10	2010-12-01	1954	56	(55,65]
42	5	2010-07-01	10	2010-12-01	1979	31	(25,35]
43	10	2010-07-01	5	2010-12-01	1978	32	(25,35]
44	5	2010-07-01	80	2010-12-01	1979	31	(25,35]
45	40	2010-07-01	40	2010-12-01	1976	34	(25,35]
46	80	2010-07-01	80	2010-12-01	1978	32	(25,35]
47	640	2010-07-01	640	2010-12-01	1977	33	(25,35]
48	10	2010-07-01	20	2010-12-01	1964	46	(45,55]
49	5	2010-07-01	5	2010-12-01	1957	53	(45,55]
50	20	2010-07-01	20	2010-12-01	1960	50	(45,55]
51	10	2010-07-01	20	2010-12-01	1962	48	(45,55]
52	20	2010-07-01	320	2010-12-01	1963	47	(45,55]
53	20	2010-07-01	20	2010-12-01	1965	45	(35,45]
54	5	2010-07-01	5	2010-12-01	1967	43	(35,45]
55	40	2010-07-01	40	2010-12-01	1950	60	(55,65]
56	20	2010-07-01	20	2010-12-01	1971	39	(35,45]
57	5	2010-07-01	10	2010-12-01	1974	36	(35,45]
58	80	2010-07-01	40	2010-12-01	1970	40	(35,45]
59	5	2010-07-01	5	2010-12-01	1977	33	(25,35]
60	10	2010-07-01	5	2010-12-01	1959	51	(45,55]
61	5	2010-07-01	5	2010-12-01	1952	58	(55,65]
62	160	2010-07-01	640	2010-12-01	1951	59	(55,65]
63	20	2010-07-01	20	2010-12-01	1964	46	(45,55]
64	10	2010-07-01	5	2010-12-01	1952	58	(55,65]
65	160	2010-07-01	5	2010-12-01	1958	52	(45,55]
66	40	2010-07-01	40	2010-12-01	1954	56	(55,65]
67	160	2010-07-01	80	2010-12-01	1959	51	(45,55]
68	40	2010-07-01	320	2010-12-01	1952	58	(55,65]
69	5	2010-07-01	10	2010-12-01	1961	49	(45,55]
70	80	2010-07-01	160	2010-12-01	1963	47	(45,55]
71	10	2010-07-01	20	2010-12-01	1960	50	(45,55]
72	160	2010-07-01	160	2010-12-01	1961	49	(45,55]
73	20	2010-07-01	20	2010-12-01	1960	50	(45,55]
74	10	2010-07-01	320	2010-12-01	1964	46	(45,55]
75	10	2010-07-01	5	2010-12-01	1957	53	(45,55]
76	20	2010-07-01	640	2010-12-01	1965	45	(35,45]
77	5	2010-07-01	5	2010-12-01	1963	47	(45,55]
78	20	2010-07-01	20	2010-12-01	1963	47	(45,55]
79	20	2010-07-01	20	2010-12-01	1959	51	(45,55]
80	10	2010-07-01	5	2010-12-01	1964	46	(45,55]
81	10	2010-07-01	10	2010-12-01	1967	43	(35,45]
82	5	2010-07-01	10	2010-12-01	1969	41	(35,45]
83	10	2010-07-01	10	2010-12-01	1965	45	(35,45]
84	5	2010-07-01	5	2010-12-01	1954	56	(55,65]
85	5	2010-07-01	5	2010-12-01	1966	44	(35,45]
86	5	2010-07-01	20	2010-12-01	1972	38	(35,45]
87	20	2010-07-01	40	2010-12-01	1971	39	(35,45]
88	10	2010-07-01	10	2010-12-01	1972	38	(35,45]
89	40	2010-07-01	20	2010-12-01	1972	38	(35,45]
90	10	2010-07-01	10	2010-12-01	1972	38	(35,45]
91	10	2010-07-01	5	2010-12-01	1970	40	(35,45]
92	5	2010-07-01	40	2010-12-01	1945	65	(55,65]
93	10	2010-07-01	5	2010-12-01	1969	41	(35,45]
94	10	2010-07-01	5	2010-12-01	1975	35	(25,35]
95	160	2010-07-01	160	2010-12-01	1953	57	(55,65]
96	10	2010-07-01	20	2010-12-01	1974	36	(35,45]
97	20	2010-07-01	5	2010-12-01	1973	37	(35,45]
98	160	2010-07-01	80	2010-12-01	1954	56	(55,65]
99	40	2010-07-01	40	2010-12-01	1975	35	(25,35]
100	5	2010-07-01	10	2010-12-01	1975	35	(25,35]
101	5	2010-07-01	20	2010-12-01	1978	32	(25,35]
102	5	2010-07-01	10	2010-12-01	1950	60	(55,65]
103	20	2010-07-01	20	2010-12-01	1974	36	(35,45]
104	320	2010-07-01	640	2010-12-01	1977	33	(25,35]
105	40	2010-07-01	20	2010-12-01	1979	31	(25,35]
106	40	2010-07-01	40	2010-12-01	1979	31	(25,35]
107	20	2010-07-01	40	2010-12-01	1965	45	(35,45]
108	5	2010-07-01	5	2010-12-01	1960	50	(45,55]
109	80	2010-07-01	80	2010-12-01	1960	50	(45,55]
110	80	2010-07-01	1280	2010-12-01	1948	62	(55,65]
111	10	2010-07-01	10	2010-12-01	1951	59	(55,65]
112	20	2010-07-01	40	2010-12-01	1956	54	(45,55]
113	5	2010-07-01	5	2010-12-01	1947	63	(55,65]
114	40	2010-07-01	80	2010-12-01	1960	50	(45,55]
115	5	2010-07-01	5	2010-12-01	1955	55	(45,55]
116	10	2010-07-01	20	2010-12-01	1959	51	(45,55]
117	5	2010-07-01	10	2010-12-01	1958	52	(45,55]
118	80	2010-07-01	80	2010-12-01	1947	63	(55,65]
119	10	2010-07-01	80	2010-12-01	1962	48	(45,55]
120	5	2010-07-01	10	2010-12-01	1958	52	(45,55]
121	20	2010-07-01	320	2010-12-01	1954	56	(55,65]
122	10	2010-07-01	160	2010-12-01	1954	56	(55,65]
123	80	2010-07-01	80	2010-12-01	1952	58	(55,65]
124	10	2010-07-01	10	2010-12-01	1961	49	(45,55]
125	10	2010-07-01	5	2010-12-01	1955	55	(45,55]
126	10	2010-07-01	10	2010-12-01	1960	50	(45,55]
127	5	2010-07-01	5	2010-12-01	1950	60	(55,65]
128	5	2010-07-01	10	2010-12-01	1954	56	(55,65]
129	5	2010-07-01	5	2010-12-01	1951	59	(55,65]
130	40	2010-07-01	40	2010-12-01	1957	53	(45,55]
131	20	2010-07-01	20	2010-12-01	1964	46	(45,55]
132	20	2010-07-01	20	2010-12-01	1959	51	(45,55]
133	10	2010-07-01	5	2010-12-01	1958	52	(45,55]
134	40	2010-07-01	40	2010-12-01	1964	46	(45,55]
135	5	2010-07-01	5	2010-12-01	1966	44	(35,45]
136	160	2010-07-01	160	2010-12-01	1961	49	(45,55]
137	10	2010-07-01	10	2010-12-01	1967	43	(35,45]
138	10	2010-07-01	20	2010-12-01	1955	55	(45,55]
139	40	2010-07-01	40	2010-12-01	1953	57	(55,65]
140	5	2010-07-01	5	2010-12-01	1967	43	(35,45]
141	40	2010-07-01	80	2010-12-01	1949	61	(55,65]
142	10	2010-07-01	5	2010-12-01	1955	55	(45,55]
143	40	2010-07-01	40	2010-12-01	1947	63	(55,65]
144	40	2010-07-01	40	2010-12-01	1968	42	(35,45]
145	40	2010-07-01	40	2010-12-01	1969	41	(35,45]
146	10	2010-07-01	80	2010-12-01	1959	51	(45,55]
147	80	2010-07-01	80	2010-12-01	1971	39	(35,45]
148	10	2010-07-01	10	2010-12-01	1953	57	(55,65]
149	10	2010-07-01	320	2010-12-01	1966	44	(35,45]
150	40	2010-07-01	40	2010-12-01	1969	41	(35,45]
151	10	2010-07-01	10	2010-12-01	1970	40	(35,45]
152	10	2010-07-01	20	2010-12-01	1971	39	(35,45]
153	5	2010-07-01	5	2010-12-01	1971	39	(35,45]
154	40	2010-07-01	80	2010-12-01	1953	57	(55,65]
155	20	2010-07-01	20	2010-12-01	1974	36	(35,45]
156	160	2010-07-01	160	2010-12-01	1974	36	(35,45]
157	80	2010-07-01	320	2010-12-01	1973	37	(35,45]
158	80	2010-07-01	80	2010-12-01	1949	61	(55,65]
159	5	2010-07-01	80	2010-12-01	1975	35	(25,35]
160	20	2010-07-01	20	2010-12-01	1968	42	(35,45]
161	10	2010-07-01	10	2010-12-01	1973	37	(35,45]
162	5	2010-07-01	5	2010-12-01	1973	37	(35,45]
163	10	2010-07-01	10	2010-12-01	1971	39	(35,45]
164	20	2010-07-01	40	2010-12-01	1974	36	(35,45]
165	10	2010-07-01	5	2010-12-01	1978	32	(25,35]
166	40	2010-07-01	80	2010-12-01	1979	31	(25,35]
167	10	2010-07-01	20	2010-12-01	1965	45	(35,45]
168	10	2010-07-01	40	2010-12-01	1949	61	(55,65]
169	20	2010-07-01	20	2010-12-01	1974	36	(35,45]
170	10	2010-07-01	10	2010-12-01	1958	52	(45,55]
171	10	2010-07-01	10	2010-12-01	1977	33	(25,35]
172	10	2010-07-01	10	2010-12-01	1965	45	(35,45]
173	80	2010-07-01	160	2010-12-01	1978	32	(25,35]
174	40	2010-07-01	40	2010-12-01	1965	45	(35,45]
175	5	2010-07-01	5	2010-12-01	1960	50	(45,55]
176	160	2010-07-01	160	2010-12-01	1980	30	(25,35]
177	10	2010-07-01	10	2010-12-01	1980	30	(25,35]
178	40	2010-07-01	80	2010-12-01	1951	59	(55,65]
179	10	2010-07-01	40	2010-12-01	1980	30	(25,35]
180	5	2010-07-01	160	2010-12-01	1974	36	(35,45]
181	5	2010-07-01	5	2010-12-01	1947	63	(55,65]
182	20	2010-07-01	40	2010-12-01	1979	31	(25,35]
183	10	2010-07-01	10	2010-12-01	1980	30	(25,35]
184	10	2010-07-01	10	2010-12-01	1981	29	(25,35]
185	40	2010-07-01	40	2010-12-01	1974	36	(35,45]
186	40	2010-07-01	40	2010-12-01	1982	28	(25,35]
187	10	2010-07-01	5	2010-12-01	1963	47	(45,55]
188	5	2010-07-01	10	2010-12-01	1967	43	(35,45]
189	5	2010-07-01	5	2010-12-01	1980	30	(25,35]
190	5	2010-07-01	10	2010-12-01	1976	34	(25,35]
191	10	2010-07-01	5	2010-12-01	1949	61	(55,65]
192	40	2010-07-01	1280	2010-12-01	1954	56	(55,65]
193	40	2010-07-01	40	2010-12-01	1962	48	(45,55]
194	5	2010-07-01	5	2010-12-01	1951	59	(55,65]
195	80	2010-07-01	80	2010-12-01	1983	27	(25,35]
196	40	2010-07-01	40	2010-12-01	1983	27	(25,35]
197	10	2010-07-01	20	2010-12-01	1983	27	(25,35]
198	20	2010-07-01	640	2010-12-01	1982	28	(25,35]
199	10	2010-07-01	20	2010-12-01	1983	27	(25,35]
200	20	2010-07-01	20	2010-12-01	1983	27	(25,35]
201	5	2010-07-01	5	2010-12-01	1967	43	(35,45]
202	160	2010-07-01	80	2010-12-01	1982	28	(25,35]
203	5	2010-07-01	5	2010-12-01	1946	64	(55,65]
204	320	2010-07-01	160	2010-12-01	1984	26	(25,35]
205	10	2010-07-01	5	2010-12-01	1979	31	(25,35]
206	40	2010-07-01	40	2010-12-01	1981	29	(25,35]
207	10	2010-07-01	10	2010-12-01	1985	25	(15,25]
208	10	2010-07-01	10	2010-12-01	1985	25	(15,25]
209	5	2010-07-01	5	2010-12-01	1947	63	(55,65]
210	20	2010-07-01	80	2010-12-01	1986	24	(15,25]
211	10	2010-07-01	10	2010-12-01	1967	43	(35,45]
212	5	2010-07-01	5	2010-12-01	1967	43	(35,45]
213	20	2010-07-01	40	2010-12-01	1986	24	(15,25]
214	10	2010-07-01	160	2010-12-01	1976	34	(25,35]
215	5	2010-07-01	160	2010-12-01	1978	32	(25,35]
216	20	2010-07-01	20	2010-12-01	1985	25	(15,25]
217	20	2010-07-01	20	2010-12-01	1985	25	(15,25]
218	20	2010-07-01	20	2010-12-01	1985	25	(15,25]
219	160	2010-07-01	320	2010-12-01	1969	41	(35,45]
220	20	2010-07-01	40	2010-12-01	1980	30	(25,35]
221	20	2010-07-01	40	2010-12-01	1973	37	(35,45]
222	10	2010-07-01	20	2010-12-01	1987	23	(15,25]
223	10	2010-07-01	10	2010-12-01	1986	24	(15,25]
224	160	2010-07-01	160	2010-12-01	1987	23	(15,25]
225	5	2010-07-01	5	2010-12-01	1987	23	(15,25]
226	5	2010-07-01	20	2010-12-01	1987	23	(15,25]
227	80	2010-07-01	80	2010-12-01	1964	46	(45,55]
228	5	2010-07-01	160	2010-12-01	1950	60	(55,65]
229	10	2010-07-01	20	2010-12-01	1984	26	(25,35]
230	5	2010-07-01	80	2010-12-01	1957	53	(45,55]
231	5	2010-07-01	20	2010-12-01	1969	41	(35,45]
232	5	2010-07-01	40	2010-12-01	1986	24	(15,25]
233	10	2010-07-01	80	2010-12-01	1979	31	(25,35]
234	40	2010-07-01	40	2010-12-01	1980	30	(25,35]
235	10	2010-07-01	5	2010-12-01	1984	26	(25,35]
236	160	2010-07-01	160	2010-12-01	1987	23	(15,25]
237	5	2010-07-01	5	2010-12-01	1988	22	(15,25]
238	20	2010-07-01	40	2010-12-01	1989	21	(15,25]
239	10	2010-07-01	5	2010-12-01	1962	48	(45,55]
240	20	2010-07-01	10	2010-12-01	1984	26	(25,35]
241	10	2010-07-01	10	2010-12-01	1952	58	(55,65]
242	80	2010-07-01	160	2010-12-01	1989	21	(15,25]
243	40	2010-07-01	40	2010-12-01	1988	22	(15,25]
244	10	2010-07-01	10	2010-12-01	1976	34	(25,35]
245	20	2010-07-01	40	2010-12-01	1987	23	(15,25]
246	5	2010-07-01	5	2010-12-01	1975	35	(25,35]
247	160	2010-07-01	80	2010-12-01	1989	21	(15,25]
248	10	2010-07-01	20	2010-12-01	1989	21	(15,25]
249	5	2010-07-01	20	2010-12-01	1962	48	(45,55]
250	80	2010-07-01	80	2010-12-01	1989	21	(15,25]
251	10	2010-07-01	80	2010-12-01	1988	22	(15,25]
252	5	2010-07-01	10	2010-12-01	1989	21	(15,25]
253	10	2010-07-01	10	2010-12-01	1976	34	(25,35]
254	5	2010-07-01	5	2010-12-01	1983	27	(25,35]
255	5	2010-07-01	5	2010-12-01	1962	48	(45,55]
256	5	2010-07-01	5	2010-12-01	1984	26	(25,35]
257	160	2010-07-01	20	2010-12-01	1990	20	(15,25]
258	40	2010-07-01	40	2010-12-01	1990	20	(15,25]
259	20	2010-07-01	20	2010-12-01	1985	25	(15,25]
260	10	2010-07-01	10	2010-12-01	1990	20	(15,25]
261	10	2010-07-01	10	2010-12-01	1990	20	(15,25]
262	80	2010-07-01	160	2010-12-01	1990	20	(15,25]
263	160	2010-07-01	160	2010-12-01	1991	19	(15,25]
264	5	2010-07-01	5	2010-12-01	1987	23	(15,25]
265	80	2010-07-01	80	2010-12-01	1991	19	(15,25]
266	10	2010-07-01	5	2010-12-01	1955	55	(45,55]
267	5	2010-07-01	20	2010-12-01	1991	19	(15,25]
268	10	2010-07-01	5	2010-12-01	1960	50	(45,55]
269	5	2010-07-01	5	2010-12-01	1952	58	(55,65]
270	5	2010-07-01	5	2010-12-01	1980	30	(25,35]
271	40	2010-07-01	320	2010-12-01	1988	22	(15,25]
272	160	2010-07-01	160	2010-12-01	1954	56	(55,65]
273	20	2010-07-01	20	2010-12-01	1991	19	(15,25]
274	160	2010-07-01	320	2010-12-01	1991	19	(15,25]
275	80	2010-07-01	40	2010-12-01	1990	20	(15,25]
276	80	2010-07-01	80	2010-12-01	1991	19	(15,25]
277	320	2010-07-01	160	2010-12-01	1991	19	(15,25]
278	5	2010-07-01	10	2010-12-01	1954	56	(55,65]
279	10	2010-07-01	5	2010-12-01	1991	19	(15,25]
280	80	2010-07-01	80	2010-12-01	1991	19	(15,25]
281	80	2010-07-01	160	2010-12-01	1991	19	(15,25]
282	40	2010-07-01	40	2010-12-01	1991	19	(15,25]
283	10	2010-07-01	20	2010-12-01	1991	19	(15,25]
284	10	2010-07-01	5	2010-12-01	1991	19	(15,25]
285	40	2010-07-01	40	2010-12-01	1991	19	(15,25]
286	160	2010-07-01	160	2010-12-01	1991	19	(15,25]
287	20	2010-07-01	40	2010-12-01	1991	19	(15,25]
288	160	2010-07-01	320	2010-12-01	1991	19	(15,25]
289	20	2010-07-01	10	2010-12-01	1957	53	(45,55]
290	160	2010-07-01	160	2010-12-01	1991	19	(15,25]
291	80	2010-07-01	80	2010-12-01	1991	19	(15,25]
292	40	2010-07-01	640	2010-12-01	1991	19	(15,25]
293	40	2010-07-01	40	2010-12-01	1991	19	(15,25]
294	20	2010-07-01	20	2010-12-01	1991	19	(15,25]
295	80	2010-07-01	80	2010-12-01	1991	19	(15,25]
296	5	2010-07-01	10	2010-12-01	1953	57	(55,65]
297	40	2010-07-01	40	2010-12-01	1991	19	(15,25]
298	40	2010-07-01	80	2010-12-01	1991	19	(15,25]
299	20	2010-07-01	20	2010-12-01	1954	56	(55,65]
300	160	2010-07-01	160	2010-12-01	1992	18	(15,25]
301	80	2010-07-01	160	2010-12-01	1991	19	(15,25]
302	40	2010-07-01	80	2010-12-01	1991	19	(15,25]
303	80	2010-07-01	160	2010-12-01	1991	19	(15,25]
304	160	2010-07-01	320	2010-12-01	1992	18	(15,25]
305	20	2010-07-01	5	2010-12-01	1967	43	(35,45]
306	5	2010-07-01	10	2010-12-01	1973	37	(35,45]
307	5	2010-07-01	5	2010-12-01	1958	52	(45,55]
308	10	2010-07-01	20	2010-12-01	1990	20	(15,25]
309	80	2010-07-01	80	2010-12-01	1991	19	(15,25]
310	40	2010-07-01	40	2010-12-01	1972	38	(35,45]
311	10	2010-07-01	5	2010-12-01	1972	38	(35,45]
312	20	2010-07-01	20	2010-12-01	1990	20	(15,25]
313	160	2010-07-01	160	2010-12-01	1991	19	(15,25]
314	20	2010-07-01	5	2010-12-01	1973	37	(35,45]
315	160	2010-07-01	160	2010-12-01	1992	18	(15,25]
316	40	2010-07-01	20	2010-12-01	1992	18	(15,25]
317	640	2010-07-01	1280	2010-12-01	1992	18	(15,25]
318	10	2010-07-01	10	2010-12-01	1992	18	(15,25]
319	10	2010-07-01	10	2010-12-01	1992	18	(15,25]
320	160	2010-07-01	160	2010-12-01	1992	18	(15,25]
321	80	2010-07-01	40	2010-12-01	1979	31	(25,35]
322	40	2010-07-01	80	2010-12-01	1992	18	(15,25]
323	5	2010-07-01	10	2010-12-01	1991	19	(15,25]
324	40	2010-07-01	40	2010-12-01	1992	18	(15,25]
325	40	2010-07-01	40	2010-12-01	1992	18	(15,25]
326	10	2010-07-01	5	2010-12-01	1992	18	(15,25]
327	160	2010-07-01	320	2010-12-01	1992	18	(15,25]
328	5	2010-07-01	20	2010-12-01	1992	18	(15,25]
329	5	2010-07-01	20	2010-12-01	1992	18	(15,25]
330	160	2010-07-01	160	2010-12-01	1992	18	(15,25]
331	20	2010-07-01	40	2010-12-01	1992	18	(15,25]
332	80	2010-07-01	80	2010-12-01	1992	18	(15,25]
333	10	2010-07-01	20	2010-12-01	1992	18	(15,25]
334	80	2010-07-01	80	2010-12-01	1992	18	(15,25]
335	160	2010-07-01	160	2010-12-01	1992	18	(15,25]
336	20	2010-07-01	40	2010-12-01	1989	21	(15,25]
337	5	2010-07-01	5	2010-12-01	1991	19	(15,25]
338	10	2010-07-01	10	2010-12-01	1991	19	(15,25]
339	160	2010-07-01	320	2010-12-01	1992	18	(15,25]
340	640	2010-07-01	320	2010-12-01	1992	18	(15,25]
341	160	2010-07-01	640	2010-12-01	1992	18	(15,25]
342	160	2010-07-01	160	2010-12-01	1992	18	(15,25]
343	20	2010-07-01	80	2010-12-01	1988	22	(15,25]
344	20	2010-07-01	20	2010-12-01	1971	39	(35,45]
345	10	2010-07-01	10	2010-12-01	1992	18	(15,25]
346	40	2010-07-01	40	2010-12-01	1988	22	(15,25]
347	320	2010-07-01	640	2010-12-01	1992	18	(15,25]
348	40	2010-07-01	80	2010-12-01	1990	20	(15,25]
349	10	2010-07-01	10	2010-12-01	1968	42	(35,45]
350	320	2010-07-01	640	2010-12-01	1991	19	(15,25]
351	20	2010-07-01	40	2010-12-01	1984	26	(25,35]
352	160	2010-07-01	160	2010-12-01	1992	18	(15,25]
353	10	2010-07-01	10	2010-12-01	1981	29	(25,35]
354	10	2010-07-01	20	2010-12-01	1974	36	(35,45]
355	10	2010-07-01	5	2010-12-01	1991	19	(15,25]
356	5	2010-07-01	5	2010-12-01	1991	19	(15,25]
357	20	2010-07-01	40	2010-12-01	1993	17	(15,25]
358	20	2010-07-01	40	2010-12-01	1992	18	(15,25]
359	320	2010-07-01	160	2010-12-01	1991	19	(15,25]
360	160	2010-07-01	320	2010-12-01	1992	18	(15,25]
361	160	2010-07-01	160	2010-12-01	1991	19	(15,25]
362	80	2010-07-01	80	2010-12-01	1991	19	(15,25]
363	160	2010-07-01	320	2010-12-01	1991	19	(15,25]
364	5	2010-07-01	40	2010-12-01	1991	19	(15,25]
365	10	2010-07-01	320	2010-12-01	1992	18	(15,25]
366	10	2010-07-01	5	2010-12-01	1991	19	(15,25]
367	160	2010-07-01	160	2010-12-01	1992	18	(15,25]
368	80	2010-07-01	160	2010-12-01	1990	20	(15,25]
369	10	2010-07-01	10	2010-12-01	1993	17	(15,25]
370	80	2010-07-01	80	2010-12-01	1993	17	(15,25]
371	5	2010-07-01	80	2010-12-01	1991	19	(15,25]
372	20	2010-07-01	20	2010-12-01	1991	19	(15,25]
373	80	2010-07-01	160	2010-12-01	1992	18	(15,25]
374	40	2010-07-01	40	2010-12-01	1991	19	(15,25]
375	20	2010-07-01	10	2010-12-01	1954	56	(55,65]
376	320	2010-07-01	1280	2010-12-01	1991	19	(15,25]
