# Supplementary material for: Harnessing the potential of blood donation archives for influenza surveillance and control
Source: PLoS One. 2020 May 29;15(5):e0233605. doi: 10.1371/journal.pone.0233605 (PMC7259782; doi:10.1371/journal.pone.0233605)
Supplement: S3 Data — (XLSX) [file pone.0233605.s010.xlsx]

## Sheet: S3_data_H1_ver2
id	HI_preH1	Donation_preH1_yearmon	HI_postH1	Donation_postH1_yearmon	age	agegrp	Birth_year
1	10	2010-12-01	20	2011-04-01	52	(45,55]	1958
2	10	2010-12-01	10	2011-04-01	50	(45,55]	1960
3	80	2010-12-01	80	2011-04-01	52	(45,55]	1958
4	20	2010-12-01	160	2011-04-01	62	(55,65]	1948
5	10	2010-12-01	20	2011-04-01	56	(55,65]	1955
6	20	2010-12-01	20	2011-04-01	54	(45,55]	1956
7	10	2010-12-01	10	2011-04-01	52	(45,55]	1958
8	10	2010-12-01	10	2011-04-01	59	(55,65]	1951
9	10	2010-12-01	10	2011-04-01	53	(45,55]	1957
10	10	2010-12-01	10	2011-04-01	52	(45,55]	1958
11	5	2010-12-01	5	2011-04-01	54	(45,55]	1956
12	80	2010-12-01	40	2011-04-01	50	(45,55]	1960
13	10	2010-12-01	10	2011-04-01	52	(45,55]	1958
14	10	2010-12-01	10	2011-04-01	47	(45,55]	1963
15	10	2010-12-01	20	2011-04-01	48	(45,55]	1962
16	20	2010-12-01	10	2011-04-01	50	(45,55]	1960
17	20	2010-12-01	20	2011-04-01	46	(45,55]	1964
18	80	2010-12-01	80	2011-04-01	46	(45,55]	1964
19	40	2010-12-01	40	2011-04-01	61	(55,65]	1949
20	10	2010-12-01	20	2011-04-01	50	(45,55]	1960
21	320	2010-12-01	320	2011-04-01	45	(35,45]	1965
22	10	2010-12-01	10	2011-04-01	46	(45,55]	1964
23	40	2010-12-01	40	2011-04-01	56	(55,65]	1955
24	10	2010-12-01	20	2011-04-01	44	(35,45]	1966
25	10	2010-12-01	10	2011-04-01	48	(45,55]	1962
26	10	2010-12-01	10	2011-04-01	43	(35,45]	1967
27	10	2010-12-01	40	2011-04-01	45	(35,45]	1965
28	10	2010-12-01	10	2011-04-01	47	(45,55]	1963
29	20	2010-12-01	20	2011-04-01	48	(45,55]	1962
30	10	2010-12-01	10	2011-04-01	42	(35,45]	1968
31	10	2010-12-01	10	2011-04-01	43	(35,45]	1967
32	10	2010-12-01	10	2011-04-01	42	(35,45]	1968
33	10	2010-12-01	10	2011-04-01	46	(45,55]	1964
34	10	2010-12-01	10	2011-04-01	43	(35,45]	1967
35	20	2010-12-01	80	2011-04-01	60	(55,65]	1950
36	10	2010-12-01	40	2011-04-01	43	(35,45]	1967
37	20	2010-12-01	20	2011-04-01	56	(55,65]	1955
38	160	2010-12-01	160	2011-04-01	36	(35,45]	1974
39	20	2010-12-01	20	2011-04-01	39	(35,45]	1971
40	10	2010-12-01	10	2011-04-01	38	(35,45]	1972
41	40	2010-12-01	40	2011-04-01	40	(35,45]	1970
42	20	2010-12-01	20	2011-04-01	38	(35,45]	1972
43	10	2010-12-01	160	2011-04-01	43	(35,45]	1967
44	40	2010-12-01	160	2011-04-01	37	(35,45]	1973
45	20	2010-12-01	20	2011-04-01	46	(45,55]	1964
46	20	2010-12-01	20	2011-04-01	39	(35,45]	1971
47	10	2010-12-01	10	2011-04-01	53	(45,55]	1957
48	10	2010-12-01	10	2011-04-01	42	(35,45]	1968
49	40	2010-12-01	20	2011-04-01	36	(35,45]	1974
50	80	2010-12-01	40	2011-04-01	35	(25,35]	1975
51	40	2010-12-01	40	2011-04-01	39	(35,45]	1971
52	20	2010-12-01	10	2011-04-01	35	(25,35]	1975
53	10	2010-12-01	20	2011-04-01	37	(35,45]	1973
54	80	2010-12-01	40	2011-04-01	36	(35,45]	1974
55	20	2010-12-01	40	2011-04-01	37	(35,45]	1973
56	160	2010-12-01	160	2011-04-01	34	(25,35]	1976
57	80	2010-12-01	20	2011-04-01	34	(25,35]	1976
58	10	2010-12-01	80	2011-04-01	34	(25,35]	1976
59	10	2010-12-01	10	2011-04-01	56	(55,65]	1954
60	160	2010-12-01	80	2011-04-01	32	(25,35]	1978
61	20	2010-12-01	40	2011-04-01	37	(35,45]	1973
62	10	2010-12-01	10	2011-04-01	45	(35,45]	1965
63	20	2010-12-01	20	2011-04-01	37	(35,45]	1973
64	10	2010-12-01	10	2011-04-01	50	(45,55]	1960
65	40	2010-12-01	20	2011-04-01	32	(25,35]	1978
66	10	2010-12-01	10	2011-04-01	45	(35,45]	1965
67	10	2010-12-01	10	2011-04-01	56	(55,65]	1955
68	10	2010-12-01	20	2011-04-01	41	(35,45]	1969
69	80	2010-12-01	80	2011-04-01	47	(45,55]	1963
70	20	2010-12-01	80	2011-04-01	60	(55,65]	1950
71	20	2010-12-01	20	2011-04-01	37	(35,45]	1973
72	20	2010-12-01	20	2011-04-01	37	(35,45]	1973
73	10	2010-12-01	10	2011-04-01	46	(45,55]	1964
74	10	2010-12-01	80	2011-04-01	60	(55,65]	1950
75	80	2010-12-01	40	2011-04-01	49	(45,55]	1961
76	10	2010-12-01	10	2011-04-01	49	(45,55]	1961
77	10	2010-12-01	10	2011-04-01	47	(45,55]	1963
78	10	2010-12-01	20	2011-04-01	46	(45,55]	1964
79	10	2010-12-01	10	2011-04-01	45	(35,45]	1965
80	10	2010-12-01	40	2011-04-01	45	(35,45]	1965
81	80	2010-12-01	40	2011-04-01	45	(35,45]	1965
82	20	2010-12-01	20	2011-04-01	57	(55,65]	1953
83	10	2010-12-01	40	2011-04-01	47	(45,55]	1963
84	10	2010-12-01	10	2011-04-01	45	(35,45]	1965
85	80	2010-12-01	80	2011-04-01	43	(35,45]	1967
86	10	2010-12-01	10	2011-04-01	43	(35,45]	1967
87	10	2010-12-01	20	2011-04-01	45	(35,45]	1965
88	10	2010-12-01	5	2011-04-01	44	(35,45]	1966
89	20	2010-12-01	20	2011-04-01	59	(55,65]	1951
90	20	2010-12-01	10	2011-04-01	46	(45,55]	1964
91	20	2010-12-01	20	2011-04-01	38	(35,45]	1972
92	20	2010-12-01	20	2011-04-01	39	(35,45]	1971
93	10	2010-12-01	10	2011-04-01	41	(35,45]	1969
94	20	2010-12-01	40	2011-04-01	38	(35,45]	1972
95	20	2010-12-01	20	2011-04-01	38	(35,45]	1972
96	10	2010-12-01	10	2011-04-01	49	(45,55]	1961
97	20	2010-12-01	10	2011-04-01	40	(35,45]	1970
98	10	2010-12-01	40	2011-04-01	37	(35,45]	1973
99	10	2010-12-01	20	2011-04-01	41	(35,45]	1969
100	10	2010-12-01	10	2011-04-01	35	(25,35]	1975
101	5	2010-12-01	20	2011-04-01	35	(25,35]	1975
102	80	2010-12-01	80	2011-04-01	38	(35,45]	1972
103	20	2010-12-01	10	2011-04-01	34	(25,35]	1976
104	20	2010-12-01	10	2011-04-01	34	(25,35]	1976
105	10	2010-12-01	10	2011-04-01	33	(25,35]	1977
106	20	2010-12-01	10	2011-04-01	37	(35,45]	1973
107	5	2010-12-01	20	2011-04-01	35	(25,35]	1975
108	10	2010-12-01	20	2011-04-01	33	(25,35]	1977
109	20	2010-12-01	320	2011-04-01	33	(25,35]	1977
110	160	2010-12-01	80	2011-04-01	32	(25,35]	1978
111	20	2010-12-01	20	2011-04-01	35	(25,35]	1975
112	10	2010-12-01	20	2011-04-01	32	(25,35]	1978
113	10	2010-12-01	10	2011-04-01	56	(55,65]	1955
114	10	2010-12-01	20	2011-04-01	36	(35,45]	1974
115	160	2010-12-01	160	2011-04-01	31	(25,35]	1979
116	10	2010-12-01	10	2011-04-01	31	(25,35]	1979
117	10	2010-12-01	10	2011-04-01	45	(35,45]	1965
118	10	2010-12-01	5	2011-04-01	46	(45,55]	1964
119	20	2010-12-01	20	2011-04-01	32	(25,35]	1978
120	5	2010-12-01	20	2011-04-01	50	(45,55]	1960
121	40	2010-12-01	80	2011-04-01	30	(25,35]	1980
122	80	2010-12-01	320	2011-04-01	51	(45,55]	1959
123	20	2010-12-01	160	2011-04-01	56	(55,65]	1955
124	10	2010-12-01	5	2011-04-01	49	(45,55]	1961
125	40	2010-12-01	40	2011-04-01	53	(45,55]	1957
126	10	2010-12-01	10	2011-04-01	54	(45,55]	1956
127	10	2010-12-01	10	2011-04-01	52	(45,55]	1958
128	20	2010-12-01	10	2011-04-01	56	(55,65]	1955
129	10	2010-12-01	80	2011-04-01	52	(45,55]	1958
130	10	2010-12-01	80	2011-04-01	56	(55,65]	1955
131	20	2010-12-01	20	2011-04-01	50	(45,55]	1960
132	20	2010-12-01	20	2011-04-01	48	(45,55]	1962
133	10	2010-12-01	80	2011-04-01	47	(45,55]	1963
134	10	2010-12-01	10	2011-04-01	46	(45,55]	1964
135	10	2010-12-01	80	2011-04-01	53	(45,55]	1957
136	40	2010-12-01	40	2011-04-01	53	(45,55]	1957
137	10	2010-12-01	10	2011-04-01	45	(35,45]	1965
138	20	2010-12-01	40	2011-04-01	46	(45,55]	1964
139	20	2010-12-01	10	2011-04-01	46	(45,55]	1964
140	10	2010-12-01	10	2011-04-01	50	(45,55]	1960
141	80	2010-12-01	80	2011-04-01	46	(45,55]	1964
142	10	2010-12-01	10	2011-04-01	46	(45,55]	1964
143	10	2010-12-01	80	2011-04-01	44	(35,45]	1966
144	10	2010-12-01	10	2011-04-01	46	(45,55]	1964
145	80	2010-12-01	80	2011-04-01	46	(45,55]	1964
146	10	2010-12-01	10	2011-04-01	50	(45,55]	1960
147	80	2010-12-01	80	2011-04-01	54	(45,55]	1956
148	20	2010-12-01	320	2011-04-01	46	(45,55]	1964
149	10	2010-12-01	80	2011-04-01	56	(55,65]	1954
150	5	2010-12-01	5	2011-04-01	46	(45,55]	1964
151	10	2010-12-01	10	2011-04-01	44	(35,45]	1966
152	10	2010-12-01	10	2011-04-01	56	(55,65]	1954
153	80	2010-12-01	80	2011-04-01	53	(45,55]	1957
154	10	2010-12-01	5	2011-04-01	48	(45,55]	1962
155	10	2010-12-01	20	2011-04-01	41	(35,45]	1969
156	10	2010-12-01	320	2011-04-01	56	(55,65]	1955
157	10	2010-12-01	10	2011-04-01	41	(35,45]	1969
158	10	2010-12-01	5	2011-04-01	47	(45,55]	1963
159	10	2010-12-01	40	2011-04-01	43	(35,45]	1967
160	20	2010-12-01	40	2011-04-01	48	(45,55]	1962
161	10	2010-12-01	80	2011-04-01	42	(35,45]	1968
162	10	2010-12-01	10	2011-04-01	49	(45,55]	1961
163	40	2010-12-01	40	2011-04-01	41	(35,45]	1969
164	20	2010-12-01	20	2011-04-01	51	(45,55]	1959
165	10	2010-12-01	10	2011-04-01	44	(35,45]	1966
166	20	2010-12-01	10	2011-04-01	43	(35,45]	1967
167	20	2010-12-01	10	2011-04-01	42	(35,45]	1968
168	20	2010-12-01	10	2011-04-01	39	(35,45]	1971
169	5	2010-12-01	5	2011-04-01	39	(35,45]	1971
170	10	2010-12-01	10	2011-04-01	43	(35,45]	1967
171	10	2010-12-01	10	2011-04-01	45	(35,45]	1965
172	20	2010-12-01	20	2011-04-01	38	(35,45]	1972
173	10	2010-12-01	10	2011-04-01	56	(55,65]	1955
174	10	2010-12-01	5	2011-04-01	38	(35,45]	1972
175	40	2010-12-01	20	2011-04-01	37	(35,45]	1973
176	20	2010-12-01	20	2011-04-01	39	(35,45]	1971
177	40	2010-12-01	40	2011-04-01	39	(35,45]	1971
178	20	2010-12-01	5	2011-04-01	37	(35,45]	1973
179	20	2010-12-01	20	2011-04-01	58	(55,65]	1952
180	10	2010-12-01	5	2011-04-01	38	(35,45]	1972
181	20	2010-12-01	20	2011-04-01	36	(35,45]	1974
182	10	2010-12-01	10	2011-04-01	46	(45,55]	1964
183	20	2010-12-01	20	2011-04-01	36	(35,45]	1974
184	10	2010-12-01	5	2011-04-01	43	(35,45]	1967
185	10	2010-12-01	20	2011-04-01	40	(35,45]	1970
186	40	2010-12-01	40	2011-04-01	44	(35,45]	1966
187	10	2010-12-01	40	2011-04-01	37	(35,45]	1973
188	80	2010-12-01	80	2011-04-01	35	(25,35]	1975
189	10	2010-12-01	10	2011-04-01	36	(35,45]	1974
190	20	2010-12-01	20	2011-04-01	52	(45,55]	1958
191	10	2010-12-01	10	2011-04-01	37	(35,45]	1973
192	160	2010-12-01	160	2011-04-01	38	(35,45]	1972
193	40	2010-12-01	40	2011-04-01	34	(25,35]	1976
194	10	2010-12-01	320	2011-04-01	37	(35,45]	1973
195	20	2010-12-01	10	2011-04-01	33	(25,35]	1977
196	20	2010-12-01	20	2011-04-01	33	(25,35]	1977
197	320	2010-12-01	160	2011-04-01	33	(25,35]	1977
198	80	2010-12-01	80	2011-04-01	39	(35,45]	1971
199	20	2010-12-01	20	2011-04-01	32	(25,35]	1978
200	640	2010-12-01	160	2011-04-01	43	(35,45]	1967
201	40	2010-12-01	40	2011-04-01	37	(35,45]	1973
202	10	2010-12-01	10	2011-04-01	32	(25,35]	1978
203	10	2010-12-01	40	2011-04-01	32	(25,35]	1978
204	80	2010-12-01	160	2011-04-01	33	(25,35]	1977
205	20	2010-12-01	40	2011-04-01	34	(25,35]	1976
206	10	2010-12-01	10	2011-04-01	56	(55,65]	1955
207	10	2010-12-01	20	2011-04-01	31	(25,35]	1979
208	20	2010-12-01	5	2011-04-01	32	(25,35]	1978
209	10	2010-12-01	10	2011-04-01	43	(35,45]	1967
210	20	2010-12-01	20	2011-04-01	31	(25,35]	1979
211	20	2010-12-01	20	2011-04-01	33	(25,35]	1977
212	40	2010-12-01	20	2011-04-01	31	(25,35]	1979
213	20	2010-12-01	40	2011-04-01	48	(45,55]	1962
214	40	2010-12-01	40	2011-04-01	36	(35,45]	1974
215	20	2010-12-01	10	2011-04-01	31	(25,35]	1979
216	80	2010-12-01	80	2011-04-01	30	(25,35]	1980
217	20	2010-12-01	320	2011-04-01	30	(25,35]	1980
218	40	2010-12-01	40	2011-04-01	36	(35,45]	1974
219	10	2010-12-01	10	2011-04-01	44	(35,45]	1966
220	20	2010-12-01	20	2011-04-01	30	(25,35]	1980
221	10	2010-12-01	10	2011-04-01	56	(55,65]	1955
222	20	2010-12-01	10	2011-04-01	44	(35,45]	1966
223	10	2010-12-01	10	2011-04-01	54	(45,55]	1956
224	40	2010-12-01	40	2011-04-01	30	(25,35]	1980
225	5	2010-12-01	80	2011-04-01	40	(35,45]	1970
226	80	2010-12-01	80	2011-04-01	31	(25,35]	1979
227	40	2010-12-01	40	2011-04-01	29	(25,35]	1981
228	20	2010-12-01	20	2011-04-01	29	(25,35]	1981
229	160	2010-12-01	40	2011-04-01	59	(55,65]	1951
230	10	2010-12-01	160	2011-04-01	34	(25,35]	1976
231	10	2010-12-01	40	2011-04-01	32	(25,35]	1978
232	20	2010-12-01	5	2011-04-01	31	(25,35]	1979
233	10	2010-12-01	10	2011-04-01	29	(25,35]	1981
234	40	2010-12-01	40	2011-04-01	28	(25,35]	1982
235	20	2010-12-01	10	2011-04-01	28	(25,35]	1982
236	10	2010-12-01	160	2011-04-01	30	(25,35]	1980
237	10	2010-12-01	20	2011-04-01	29	(25,35]	1981
238	40	2010-12-01	80	2011-04-01	35	(25,35]	1975
239	40	2010-12-01	40	2011-04-01	44	(35,45]	1966
240	40	2010-12-01	40	2011-04-01	34	(25,35]	1976
241	320	2010-12-01	40	2011-04-01	43	(35,45]	1967
242	40	2010-12-01	40	2011-04-01	31	(25,35]	1979
243	20	2010-12-01	320	2011-04-01	27	(25,35]	1983
244	160	2010-12-01	160	2011-04-01	29	(25,35]	1981
245	10	2010-12-01	10	2011-04-01	27	(25,35]	1983
246	20	2010-12-01	10	2011-04-01	28	(25,35]	1982
247	20	2010-12-01	10	2011-04-01	29	(25,35]	1981
248	20	2010-12-01	80	2011-04-01	27	(25,35]	1983
249	320	2010-12-01	320	2011-04-01	28	(25,35]	1982
250	10	2010-12-01	40	2011-04-01	29	(25,35]	1981
251	80	2010-12-01	20	2011-04-01	27	(25,35]	1983
252	20	2010-12-01	20	2011-04-01	27	(25,35]	1983
253	10	2010-12-01	10	2011-04-01	43	(35,45]	1967
254	10	2010-12-01	10	2011-04-01	26	(25,35]	1984
255	40	2010-12-01	40	2011-04-01	27	(25,35]	1983
256	10	2010-12-01	10	2011-04-01	54	(45,55]	1956
257	10	2010-12-01	10	2011-04-01	52	(45,55]	1958
258	10	2010-12-01	10	2011-04-01	38	(35,45]	1972
259	10	2010-12-01	20	2011-04-01	43	(35,45]	1967
260	40	2010-12-01	40	2011-04-01	29	(25,35]	1981
261	10	2010-12-01	40	2011-04-01	59	(55,65]	1951
262	40	2010-12-01	40	2011-04-01	28	(25,35]	1982
263	10	2010-12-01	10	2011-04-01	57	(55,65]	1953
264	10	2010-12-01	160	2011-04-01	28	(25,35]	1982
265	40	2010-12-01	40	2011-04-01	26	(25,35]	1984
266	10	2010-12-01	10	2011-04-01	26	(25,35]	1984
267	5	2010-12-01	20	2011-04-01	35	(25,35]	1975
268	10	2010-12-01	10	2011-04-01	43	(35,45]	1967
269	20	2010-12-01	160	2011-04-01	53	(45,55]	1957
270	10	2010-12-01	20	2011-04-01	48	(45,55]	1962
271	10	2010-12-01	10	2011-04-01	41	(35,45]	1969
272	20	2010-12-01	20	2011-04-01	41	(35,45]	1969
273	10	2010-12-01	10	2011-04-01	25	(15,25]	1985
274	10	2010-12-01	80	2011-04-01	26	(25,35]	1984
275	10	2010-12-01	10	2011-04-01	25	(15,25]	1985
276	10	2010-12-01	80	2011-04-01	25	(15,25]	1985
277	80	2010-12-01	80	2011-04-01	25	(15,25]	1985
278	10	2010-12-01	10	2011-04-01	25	(15,25]	1985
279	20	2010-12-01	10	2011-04-01	63	(55,65]	1947
280	20	2010-12-01	20	2011-04-01	31	(25,35]	1979
281	10	2010-12-01	10	2011-04-01	27	(25,35]	1983
282	10	2010-12-01	160	2011-04-01	53	(45,55]	1957
283	10	2010-12-01	10	2011-04-01	46	(45,55]	1964
284	10	2010-12-01	40	2011-04-01	51	(45,55]	1959
285	320	2010-12-01	320	2011-04-01	24	(15,25]	1986
286	20	2010-12-01	160	2011-04-01	34	(25,35]	1976
287	10	2010-12-01	10	2011-04-01	24	(15,25]	1986
288	10	2010-12-01	10	2011-04-01	24	(15,25]	1986
289	10	2010-12-01	10	2011-04-01	29	(25,35]	1981
290	10	2010-12-01	10	2011-04-01	25	(15,25]	1985
291	10	2010-12-01	20	2011-04-01	43	(35,45]	1967
292	10	2010-12-01	10	2011-04-01	25	(15,25]	1985
293	10	2010-12-01	10	2011-04-01	38	(35,45]	1972
294	10	2010-12-01	10	2011-04-01	30	(25,35]	1980
295	20	2010-12-01	20	2011-04-01	38	(35,45]	1972
296	10	2010-12-01	10	2011-04-01	54	(45,55]	1956
297	10	2010-12-01	40	2011-04-01	37	(35,45]	1973
298	80	2010-12-01	80	2011-04-01	23	(15,25]	1987
299	10	2010-12-01	160	2011-04-01	25	(15,25]	1985
300	20	2010-12-01	160	2011-04-01	23	(15,25]	1987
301	10	2010-12-01	10	2011-04-01	24	(15,25]	1986
302	20	2010-12-01	20	2011-04-01	46	(45,55]	1964
303	10	2010-12-01	40	2011-04-01	46	(45,55]	1964
304	10	2010-12-01	10	2011-04-01	24	(15,25]	1986
305	10	2010-12-01	10	2011-04-01	23	(15,25]	1987
306	320	2010-12-01	160	2011-04-01	25	(15,25]	1985
307	10	2010-12-01	10	2011-04-01	24	(15,25]	1986
308	20	2010-12-01	20	2011-04-01	33	(25,35]	1977
309	20	2010-12-01	5	2011-04-01	31	(25,35]	1979
310	1280	2010-12-01	320	2011-04-01	23	(15,25]	1987
311	10	2010-12-01	10	2011-04-01	22	(15,25]	1988
312	40	2010-12-01	40	2011-04-01	23	(15,25]	1987
313	20	2010-12-01	160	2011-04-01	22	(15,25]	1988
314	80	2010-12-01	80	2011-04-01	22	(15,25]	1988
315	10	2010-12-01	10	2011-04-01	23	(15,25]	1987
316	10	2010-12-01	80	2011-04-01	23	(15,25]	1987
317	80	2010-12-01	80	2011-04-01	22	(15,25]	1988
318	10	2010-12-01	20	2011-04-01	22	(15,25]	1988
319	160	2010-12-01	80	2011-04-01	23	(15,25]	1987
320	640	2010-12-01	320	2011-04-01	23	(15,25]	1987
321	10	2010-12-01	10	2011-04-01	21	(15,25]	1989
322	20	2010-12-01	20	2011-04-01	48	(45,55]	1962
323	20	2010-12-01	10	2011-04-01	24	(15,25]	1986
324	40	2010-12-01	40	2011-04-01	58	(55,65]	1952
325	10	2010-12-01	10	2011-04-01	27	(25,35]	1983
326	20	2010-12-01	5	2011-04-01	35	(25,35]	1975
327	20	2010-12-01	20	2011-04-01	27	(25,35]	1983
328	5	2010-12-01	5	2011-04-01	40	(35,45]	1970
329	10	2010-12-01	320	2011-04-01	22	(15,25]	1988
330	20	2010-12-01	20	2011-04-01	34	(25,35]	1976
331	40	2010-12-01	40	2011-04-01	23	(15,25]	1987
332	20	2010-12-01	20	2011-04-01	36	(35,45]	1974
333	80	2010-12-01	80	2011-04-01	22	(15,25]	1988
334	40	2010-12-01	40	2011-04-01	28	(25,35]	1982
335	20	2010-12-01	20	2011-04-01	20	(15,25]	1990
336	160	2010-12-01	80	2011-04-01	21	(15,25]	1989
337	10	2010-12-01	5	2011-04-01	37	(35,45]	1973
338	10	2010-12-01	20	2011-04-01	48	(45,55]	1962
339	320	2010-12-01	160	2011-04-01	38	(35,45]	1972
340	10	2010-12-01	10	2011-04-01	40	(35,45]	1970
341	10	2010-12-01	10	2011-04-01	22	(15,25]	1988
342	320	2010-12-01	160	2011-04-01	48	(45,55]	1962
343	10	2010-12-01	10	2011-04-01	21	(15,25]	1989
344	10	2010-12-01	80	2011-04-01	20	(15,25]	1990
345	10	2010-12-01	20	2011-04-01	46	(45,55]	1964
346	20	2010-12-01	80	2011-04-01	20	(15,25]	1990
347	40	2010-12-01	40	2011-04-01	22	(15,25]	1988
348	160	2010-12-01	80	2011-04-01	20	(15,25]	1990
349	20	2010-12-01	20	2011-04-01	20	(15,25]	1990
350	10	2010-12-01	160	2011-04-01	20	(15,25]	1990
351	10	2010-12-01	80	2011-04-01	38	(35,45]	1972
352	20	2010-12-01	20	2011-04-01	45	(35,45]	1965
353	80	2010-12-01	80	2011-04-01	20	(15,25]	1990
354	80	2010-12-01	80	2011-04-01	23	(15,25]	1987
355	20	2010-12-01	20	2011-04-01	49	(45,55]	1961
356	10	2010-12-01	10	2011-04-01	62	(55,65]	1948
357	20	2010-12-01	20	2011-04-01	47	(45,55]	1963
358	1280	2010-12-01	80	2011-04-01	22	(15,25]	1988
359	10	2010-12-01	10	2011-04-01	20	(15,25]	1990
360	5	2010-12-01	5	2011-04-01	19	(15,25]	1991
361	10	2010-12-01	5	2011-04-01	33	(25,35]	1977
362	10	2010-12-01	80	2011-04-01	19	(15,25]	1991
363	80	2010-12-01	80	2011-04-01	19	(15,25]	1991
364	10	2010-12-01	10	2011-04-01	53	(45,55]	1957
365	10	2010-12-01	10	2011-04-01	19	(15,25]	1991
366	10	2010-12-01	10	2011-04-01	56	(55,65]	1954
367	10	2010-12-01	40	2011-04-01	32	(25,35]	1978
368	20	2010-12-01	20	2011-04-01	56	(55,65]	1954
369	10	2010-12-01	10	2011-04-01	21	(15,25]	1989
370	10	2010-12-01	10	2011-04-01	27	(25,35]	1983
371	20	2010-12-01	20	2011-04-01	38	(35,45]	1972
372	10	2010-12-01	20	2011-04-01	19	(15,25]	1991
373	10	2010-12-01	40	2011-04-01	20	(15,25]	1990
374	40	2010-12-01	40	2011-04-01	38	(35,45]	1972
375	20	2010-12-01	20	2011-04-01	37	(35,45]	1973
376	20	2010-12-01	20	2011-04-01	38	(35,45]	1972
377	20	2010-12-01	20	2011-04-01	33	(25,35]	1977
378	10	2010-12-01	10	2011-04-01	31	(25,35]	1979
379	20	2010-12-01	10	2011-04-01	18	(15,25]	1992
380	80	2010-12-01	80	2011-04-01	18	(15,25]	1992
381	5	2010-12-01	5	2011-04-01	39	(35,45]	1971
382	80	2010-12-01	20	2011-04-01	20	(15,25]	1990
383	10	2010-12-01	10	2011-04-01	42	(35,45]	1968
384	20	2010-12-01	320	2011-04-01	37	(35,45]	1973
385	10	2010-12-01	10	2011-04-01	26	(25,35]	1984
386	10	2010-12-01	40	2011-04-01	29	(25,35]	1981
387	40	2010-12-01	40	2011-04-01	42	(35,45]	1968
388	20	2010-12-01	20	2011-04-01	29	(25,35]	1981
389	10	2010-12-01	20	2011-04-01	36	(35,45]	1974
390	20	2010-12-01	20	2011-04-01	45	(35,45]	1965
391	10	2010-12-01	10	2011-04-01	39	(35,45]	1971
392	20	2010-12-01	20	2011-04-01	25	(15,25]	1985
